# Supplementary figures and images for: Effects of Diets Differing in Composition of 18-C Fatty Acids on Adipose Tissue Thermogenic Gene Expression in Mice Fed High-Fat Diets
Source: MDPI journal article supplement (doi:10.3390/nu10020256), 2018-02-23

**Figure S1**

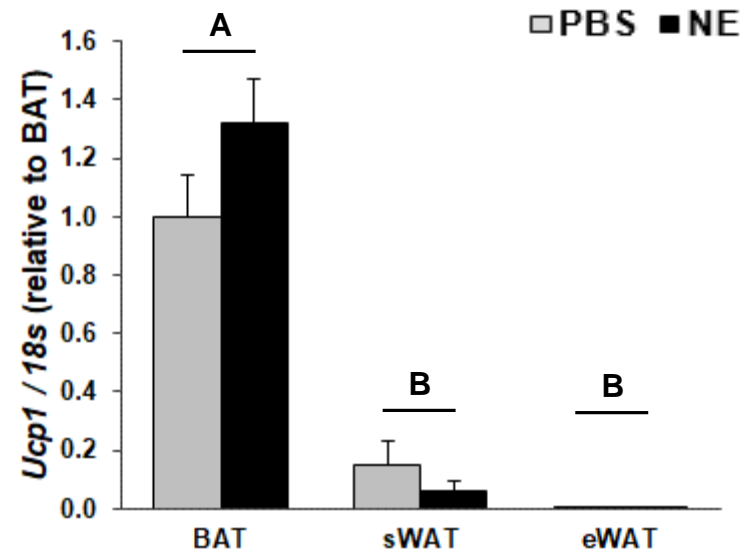

Tissue,  $P < .0001$ ; NE,  $P = .3042$ ; T\*N,  $P = .0766$

Supplement: s1 [file s1]
